# Supplementary material
Source: PubMed Central journal article supplement (PMC3014460)
Supplement: NIHMS247777-supplement-01.pdf [file NIHMS247777-supplement-01.pdf]

**Supplemental Fig. S1**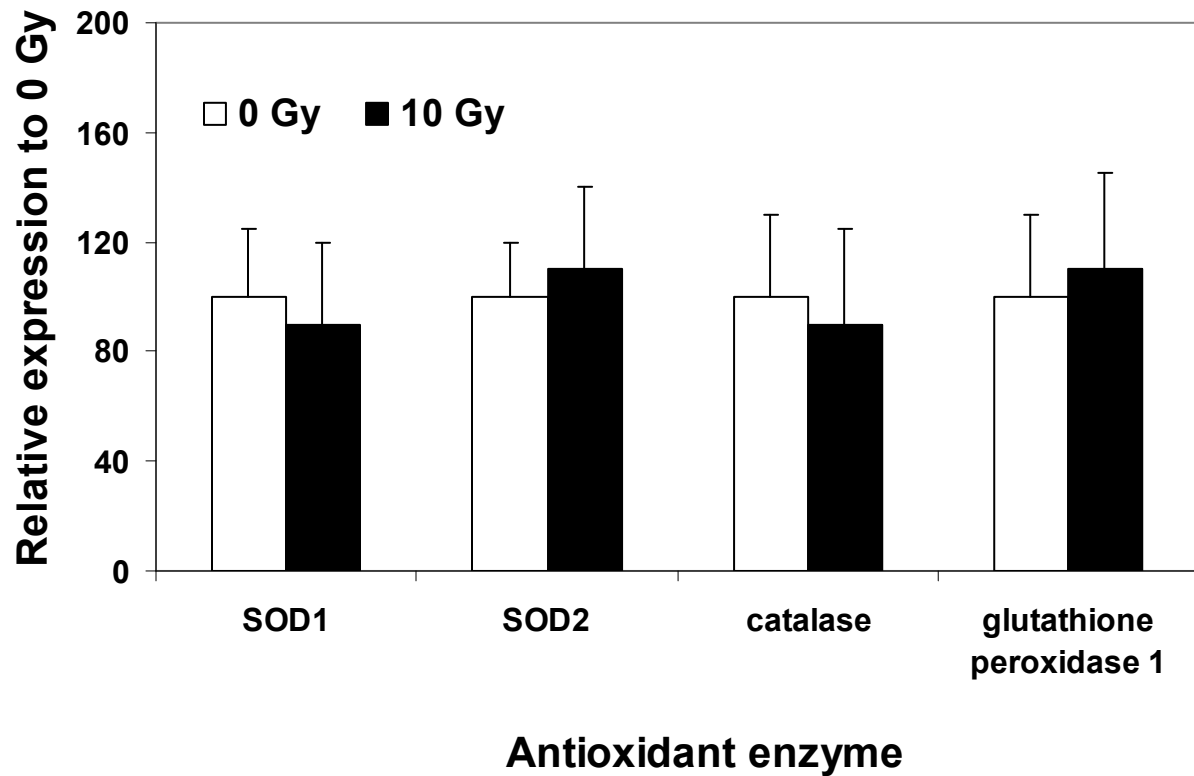

**Fig. S1.** Expression of antioxidant enzymes in mice acutely irradiated with 10 Gy, and then sacrificed 10 d postirradiation. At this time, intestinal sugar transport has already decreased by ~50% in irradiated mice [7]. There were, however, no changes in mRNA abundance of antioxidant enzymes in the gut.

**Supplemental Fig. S2**

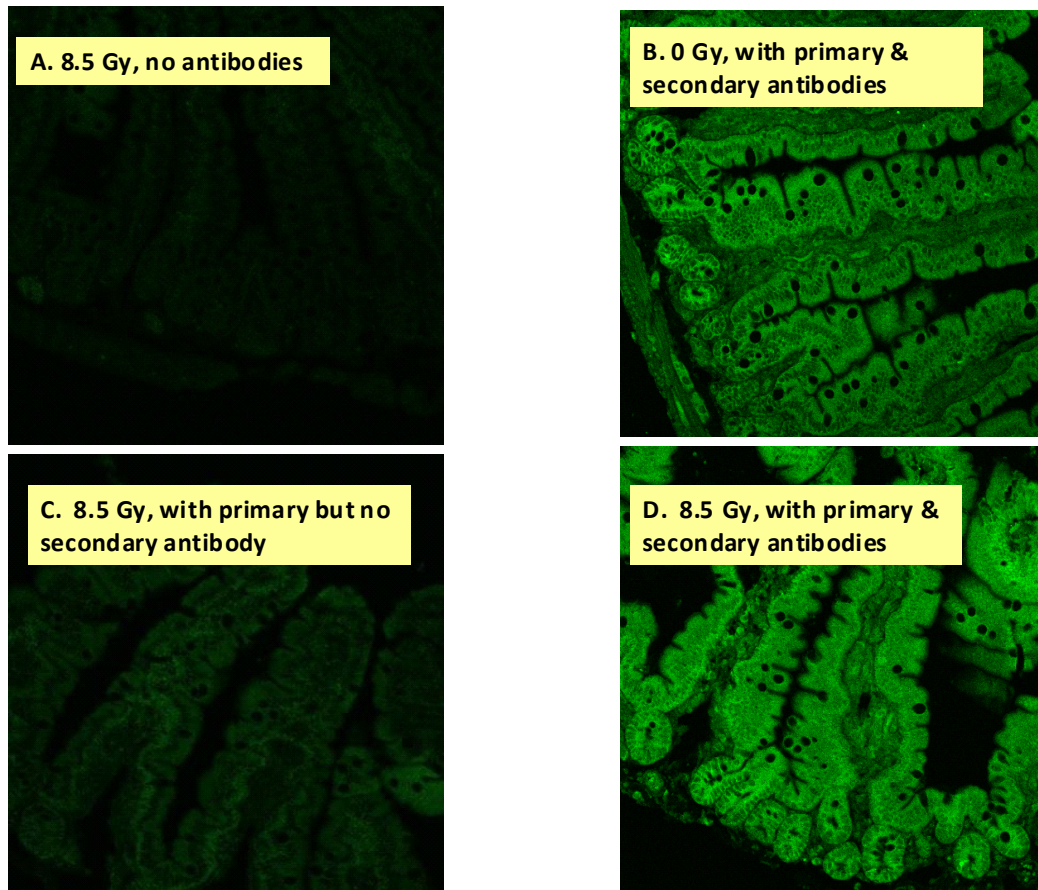

**Fig. S2.** Location of the oxidative stress biomarker 4HNE in the intestine of irradiated mice. The irradiated and unirradiated mice were taken from a batch of mice different from those shown in Fig. 5. (**A**) section from irradiated mice, no antibodies; (**B**) unirradiated mice with primary and secondary antibodies; (**C**): irradiated mice with primary but no secondary antibody; (**D**) irradiated mice with primary and secondary antibodies. Results suggest that most of the 4HNE are found in epithelial cells, and levels seemed to increase upon irradiation.

**Supplemental Fig. S3**

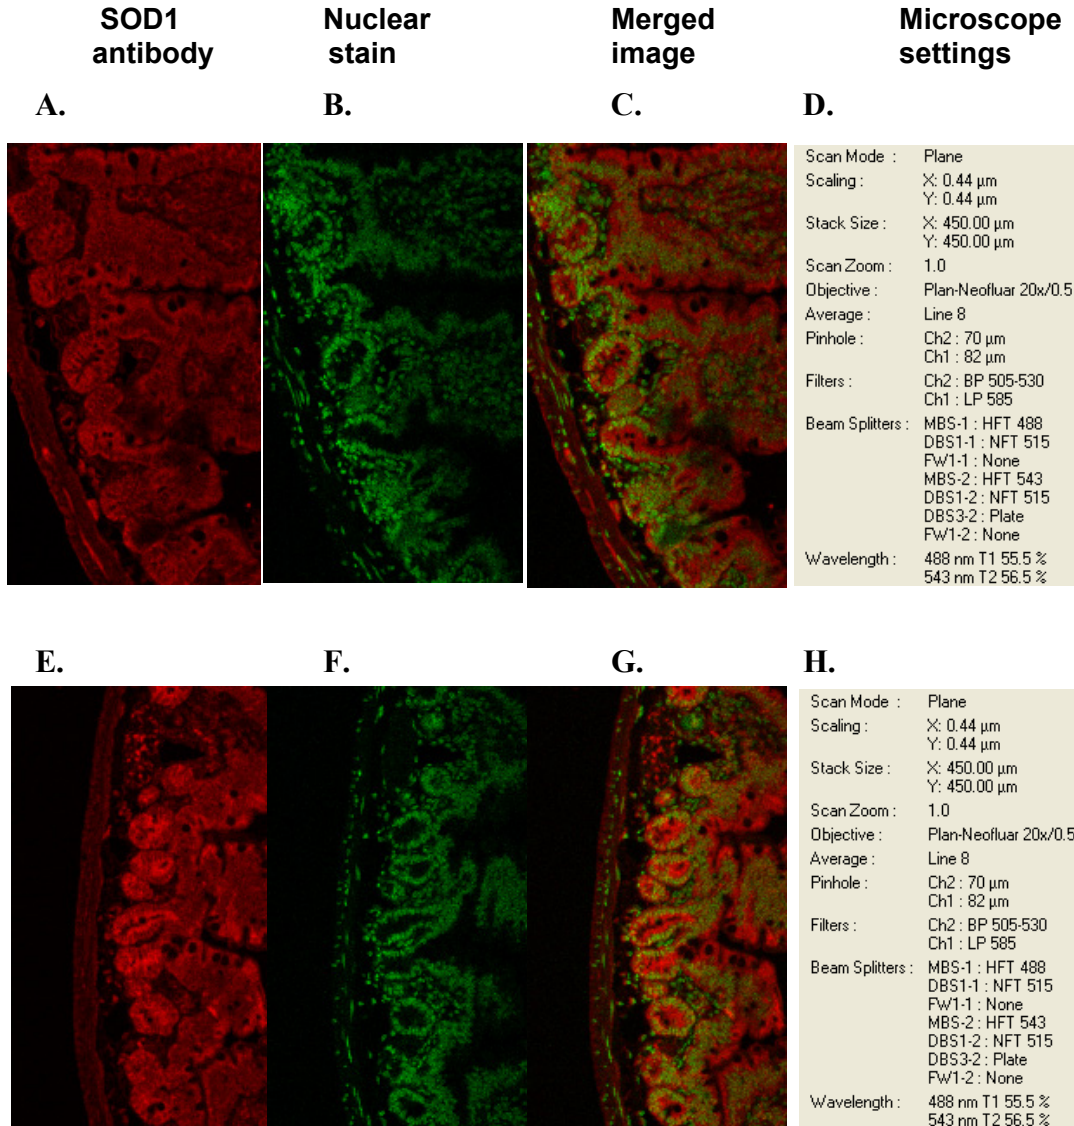

**Fig. S3.** Immunolocalization of SOD1 (red) in the small intestine after acute whole-body irradiation with 0 (top row, **A - C**) and 8.5 Gy (bottom row, **E - G**). Confocal microscope settings used to obtain the images from unirradiated (**D**) or irradiated (**H**) mice are provided and are the same for both sets of images. Like Fig. 6, increases in fluorescence intensity of the SOD1 label of 8.5Gy (**Panel E**) are greater than those of the 0 Gy mouse (**Panel A**), particularly in the crypt regions, and are mainly cytosolic (**Panels C and G**). In contrast, levels of nuclear staining are similar (**Panels B and F**).

**Supplemental Fig. S4.**

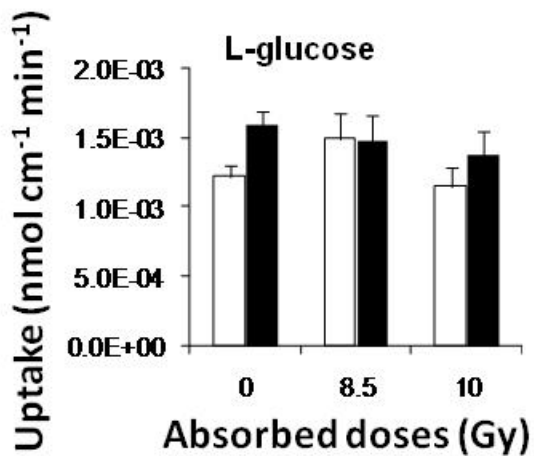

**Fig. S4.** Uptake of L-glucose per cm of small intestine at day 8 post-irradiation. Mice were fed with control, unsupplemented diet (open bars) or with a vitamin ACE supplanted diet (filled bars). Results are means ( $\pm$  SE) of 6 independent experiments. There was no significant effect of diet and radiation dose on L-glucose uptake which represents passive permeability of the intestinal mucosa to molecules of similar size, shape and charge as D-glucose.
